# Supplementary material for: Whole genome expression and biochemical correlates of extreme constitutional types defined in Ayurveda
Source: PubMed Central journal article supplement (PMC2562368; doi:10.1186/1479-5876-6-48), 2008-09-09
Supplement: 1479-5876-6-48-S2.pdf [file 1479-5876-6-48-S2.pdf]

# Questionnaire for *Prakriti* evaluation

## Personal information

## Language and Ethnicity

## Gender

## Age

## Height

## Weight

## Family history of Disease

### .Vital Data

(a) Pulse Rate/min:

|  |  |  |
|--|--|--|
|  |  |  |
|--|--|--|

(b) Blood Pressure (mmhg)

|          |  |  |           |  |  |
|----------|--|--|-----------|--|--|
|          |  |  |           |  |  |
| Systolic |  |  | Diastolic |  |  |

(c) Wrist Circumference (inch)

|  |  |
|--|--|
|  |  |
|--|--|

(d) Body frame by Wrist finger ratio

|  |  |  |  |  |  |
|--|--|--|--|--|--|
|  |  |  |  |  |  |
|--|--|--|--|--|--|

(d) Waist Circumference (inch)

|  |  |  |
|--|--|--|
|  |  |  |
|--|--|--|

(e) Hip Circumference (inch)

|  |  |  |
|--|--|--|
|  |  |  |
|--|--|--|

(f) Forearm measurement (inch)

|  |  |  |
|--|--|--|
|  |  |  |
|--|--|--|

(g) Waist-Hip ratio

|  |  |  |
|--|--|--|
|  |  |  |
|--|--|--|

(h) B.M.I.

|  |  |  |
|--|--|--|
|  |  |  |
|--|--|--|

## A. Anatomical Features

| A-1        | Symmetry              |                       | Shape                 |                       | Length/Height         |                       |                       | Breadth               |                       |                       |
|------------|-----------------------|-----------------------|-----------------------|-----------------------|-----------------------|-----------------------|-----------------------|-----------------------|-----------------------|-----------------------|
|            | Proportionate         | Disproportionate      | Regular               | Irregular             | Too Short / Too Long  | Medium                | Long                  | Thin / Narrow         | Medium                | Broad                 |
| Body Build | <input type="radio"/> | <input type="radio"/> |                       |                       |                       |                       |                       |                       |                       |                       |
| Body Frame | <input type="radio"/> | <input type="radio"/> | <input type="radio"/> | <input type="radio"/> | <input type="radio"/> | <input type="radio"/> | <input type="radio"/> | <input type="radio"/> | <input type="radio"/> | <input type="radio"/> |
| Head       | <input type="radio"/> | <input type="radio"/> | <input type="radio"/> | <input type="radio"/> |                       |                       |                       |                       |                       |                       |
| Forehead   | <input type="radio"/> | <input type="radio"/> |                       |                       | <input type="radio"/> | <input type="radio"/> | <input type="radio"/> | <input type="radio"/> | <input type="radio"/> | <input type="radio"/> |
| Face       | <input type="radio"/> | <input type="radio"/> | <input type="radio"/> | <input type="radio"/> |                       |                       |                       |                       |                       |                       |
| Eyebrows   |                       |                       | <input type="radio"/> | <input type="radio"/> |                       |                       |                       |                       |                       |                       |
| Eyes       | <input type="radio"/> | <input type="radio"/> | <input type="radio"/> | <input type="radio"/> |                       |                       |                       |                       |                       |                       |
| Lips       |                       |                       | <input type="radio"/> | <input type="radio"/> |                       |                       |                       |                       |                       |                       |
| Jaws       |                       |                       | <input type="radio"/> | <input type="radio"/> |                       |                       |                       |                       |                       |                       |
| Shoulder   |                       |                       | <input type="radio"/> | <input type="radio"/> |                       |                       |                       | <input type="radio"/> | <input type="radio"/> | <input type="radio"/> |
| Chest      | <input type="radio"/> | <input type="radio"/> | <input type="radio"/> | <input type="radio"/> |                       |                       |                       | <input type="radio"/> | <input type="radio"/> | <input type="radio"/> |
| Hands      | <input type="radio"/> | <input type="radio"/> |                       |                       | <input type="radio"/> | <input type="radio"/> | <input type="radio"/> |                       |                       |                       |
| Palms      | <input type="radio"/> | <input type="radio"/> |                       |                       |                       |                       |                       |                       |                       |                       |
| Nails      |                       |                       |                       |                       | <input type="radio"/> | <input type="radio"/> | <input type="radio"/> |                       |                       |                       |
| Legs       | <input type="radio"/> | <input type="radio"/> |                       |                       | <input type="radio"/> | <input type="radio"/> | <input type="radio"/> |                       |                       |                       |
| Soles      | <input type="radio"/> | <input type="radio"/> |                       |                       |                       |                       |                       |                       |                       |                       |
| Joints     | <input type="radio"/> | <input type="radio"/> |                       |                       |                       |                       |                       |                       |                       |                       |

| A-3               | Skin                  |  |          |                       |                 |                       |              |                       |
|-------------------|-----------------------|--|----------|-----------------------|-----------------|-----------------------|--------------|-----------------------|
|                   | Nature                |  | Texture  |                       | Appearance      |                       | Colour       |                       |
| Dry               | <input type="radio"/> |  | Smooth   | <input type="radio"/> | Cracked         | <input type="radio"/> | Fair         | <input type="radio"/> |
| Oily              | <input type="radio"/> |  | Firm     | <input type="radio"/> | Wrinkled        | <input type="radio"/> | Dark         | <input type="radio"/> |
| Normal            | <input type="radio"/> |  | Lustrous | <input type="radio"/> | Moles           | <input type="radio"/> | Reddish      | <input type="radio"/> |
| Seasonal/Variable | <input type="radio"/> |  | Soft     | <input type="radio"/> | Marks           | <input type="radio"/> | Pale Yellow  | <input type="radio"/> |
| Thick             | <input type="radio"/> |  | Loose    | <input type="radio"/> | Pimples         | <input type="radio"/> | Pink         | <input type="radio"/> |
| Thin              | <input type="radio"/> |  | Rough    | <input type="radio"/> | Freckles        | <input type="radio"/> | Wheatish     | <input type="radio"/> |
| Hard              | <input type="radio"/> |  | Coarse   | <input type="radio"/> | Clear           | <input type="radio"/> | Golden       | <input type="radio"/> |
|                   |                       |  |          |                       | Prominent Veins | <input type="radio"/> | Fresh Colour | <input type="radio"/> |
|                   |                       |  |          |                       |                 |                       | Dusky        | <input type="radio"/> |

| A-4         | Scalp hair            |                   |                       |          |                       |             | A-5                   | Colour                |           |
|-------------|-----------------------|-------------------|-----------------------|----------|-----------------------|-------------|-----------------------|-----------------------|-----------|
|             | Texture               |                   | Nature                |          | Growth /Bulk          |             |                       | Scalp hair            | Body hair |
| Thick       | <input type="radio"/> | Graying           | <input type="radio"/> | Dense    | <input type="radio"/> | Black       | <input type="radio"/> | <input type="radio"/> |           |
| Thin        | <input type="radio"/> | Falling           | <input type="radio"/> | Scanty   | <input type="radio"/> | Dark Brown  | <input type="radio"/> | <input type="radio"/> |           |
| Coarse      | <input type="radio"/> | Breaking          | <input type="radio"/> | Moderate | <input type="radio"/> | Light Brown | <input type="radio"/> | <input type="radio"/> |           |
| Hard        | <input type="radio"/> | None              | <input type="radio"/> | Bald     | <input type="radio"/> | Dusky       | <input type="radio"/> | <input type="radio"/> |           |
| Smooth      | <input type="radio"/> | Dry               | <input type="radio"/> |          |                       | Blonde      | <input type="radio"/> | <input type="radio"/> |           |
| Soft        | <input type="radio"/> | Oily              | <input type="radio"/> |          |                       | Copper      | <input type="radio"/> | <input type="radio"/> |           |
| Straight    | <input type="radio"/> | Normal            | <input type="radio"/> |          |                       |             |                       |                       |           |
| Wavy        | <input type="radio"/> | Seasonal/Variable | <input type="radio"/> |          |                       |             |                       |                       |           |
| Fizzy/Curly | <input type="radio"/> |                   |                       |          |                       |             |                       |                       |           |

| A-2        | Size / Bulk / Musculature      |                               |                              |
|------------|--------------------------------|-------------------------------|------------------------------|
|            | Small / Weakly developed/ thin | Medium / Moderately developed | Large / Big / Well developed |
| Body Build | <input type="radio"/>          | <input type="radio"/>         | <input type="radio"/>        |
| Joints     | <input type="radio"/>          | <input type="radio"/>         | <input type="radio"/>        |
| Face       | <input type="radio"/>          | <input type="radio"/>         | <input type="radio"/>        |
| Eyes       | <input type="radio"/>          | <input type="radio"/>         | <input type="radio"/>        |
| Eyebrows   | <input type="radio"/>          | <input type="radio"/>         | <input type="radio"/>        |
| Eyelashes  | <input type="radio"/>          | <input type="radio"/>         | <input type="radio"/>        |
| Lips       | <input type="radio"/>          | <input type="radio"/>         | <input type="radio"/>        |

|            |                                   |                                               |
|------------|-----------------------------------|-----------------------------------------------|
| <b>A-6</b> | <b>Eye</b>                        |                                               |
|            | <b>Colour</b>                     | <b>Appearance</b>                             |
|            | Black <input type="radio"/>       | Dry/Dull <input type="radio"/>                |
|            | Dark Brown <input type="radio"/>  | Dim in luster <input type="radio"/>           |
|            | Light Brown <input type="radio"/> | Shiny <input type="radio"/>                   |
|            | Greyish <input type="radio"/>     | Milky white sclera <input type="radio"/>      |
|            | Blue <input type="radio"/>        | Reddish tinge to sclera <input type="radio"/> |
|            | Green <input type="radio"/>       | Muddy sclera <input type="radio"/>            |

|            |                                 |                                        |                                 |                                       |
|------------|---------------------------------|----------------------------------------|---------------------------------|---------------------------------------|
| <b>A-7</b> | <b>Teeth</b>                    |                                        |                                 |                                       |
|            | <b>Size</b>                     | <b>Appearance</b>                      | <b>Shape</b>                    | <b>Color</b>                          |
|            | Too small <input type="radio"/> | Brittle/ Cracked <input type="radio"/> | Regular <input type="radio"/>   | Milky white <input type="radio"/>     |
|            | Too large <input type="radio"/> | Loose <input type="radio"/>            | Irregular <input type="radio"/> | Yellowish <input type="radio"/>       |
|            | Medium <input type="radio"/>    | Lustrous <input type="radio"/>         | Even <input type="radio"/>      | Dull / blackish <input type="radio"/> |
|            | Large <input type="radio"/>     |                                        | Uneven <input type="radio"/>    |                                       |

|            |                   |                       |                       |                       |                       |                       |                       |                       |                       |                       |                           |                       |                       |                       |
|------------|-------------------|-----------------------|-----------------------|-----------------------|-----------------------|-----------------------|-----------------------|-----------------------|-----------------------|-----------------------|---------------------------|-----------------------|-----------------------|-----------------------|
| <b>A-8</b> | <b>Complexion</b> |                       | <b>Colour</b>         |                       | <b>Nature</b>         |                       |                       |                       |                       |                       |                           |                       |                       |                       |
|            |                   |                       | Dark                  | Reddish               | Pale Yellow           | Pink                  | Smooth                | Firm                  | Soft                  | Rough                 | Brittle / Cracked / Split | Wrinkled              | Flat                  | Convex                |
|            | Palms             | <input type="radio"/> | <input type="radio"/> | <input type="radio"/> | <input type="radio"/> | <input type="radio"/> | <input type="radio"/> | <input type="radio"/> | <input type="radio"/> | <input type="radio"/> | <input type="radio"/>     | <input type="radio"/> | <input type="radio"/> | <input type="radio"/> |
|            | Soles             | <input type="radio"/> | <input type="radio"/> | <input type="radio"/> | <input type="radio"/> | <input type="radio"/> | <input type="radio"/> | <input type="radio"/> | <input type="radio"/> | <input type="radio"/> | <input type="radio"/>     | <input type="radio"/> | <input type="radio"/> | <input type="radio"/> |
|            | Lips              | <input type="radio"/> | <input type="radio"/> | <input type="radio"/> | <input type="radio"/> | <input type="radio"/> | <input type="radio"/> | <input type="radio"/> | <input type="radio"/> | <input type="radio"/> | <input type="radio"/>     | <input type="radio"/> | <input type="radio"/> | <input type="radio"/> |
|            | Nails             | <input type="radio"/> | <input type="radio"/> | <input type="radio"/> | <input type="radio"/> | <input type="radio"/> | <input type="radio"/> | <input type="radio"/> | <input type="radio"/> | <input type="radio"/> | <input type="radio"/>     | <input type="radio"/> | <input type="radio"/> | <input type="radio"/> |
|            | Palate            | <input type="radio"/> | <input type="radio"/> | <input type="radio"/> | <input type="radio"/> | <input type="radio"/> | <input type="radio"/> | <input type="radio"/> | <input type="radio"/> | <input type="radio"/> | <input type="radio"/>     | <input type="radio"/> | <input type="radio"/> | <input type="radio"/> |

## B. Physiological Functions

|            |                                |                       |                       |                       |                       |                       |                       |                       |                       |                       |
|------------|--------------------------------|-----------------------|-----------------------|-----------------------|-----------------------|-----------------------|-----------------------|-----------------------|-----------------------|-----------------------|
| <b>B-1</b> | <b>Metabolism</b>              |                       |                       |                       |                       |                       |                       |                       |                       |                       |
|            | <b>Frequency</b>               | <b>Amount</b>         |                       |                       |                       |                       |                       |                       |                       |                       |
|            | Regular                        | Irregular             | Frequent              | Infrequent            | Medium                | Variable              | Low                   | High                  | Medium                | Variable              |
|            | Appetite <input type="radio"/> | <input type="radio"/> | <input type="radio"/> | <input type="radio"/> | <input type="radio"/> | <input type="radio"/> | <input type="radio"/> | <input type="radio"/> | <input type="radio"/> | <input type="radio"/> |
|            | Thirst <input type="radio"/>   | <input type="radio"/> | <input type="radio"/> | <input type="radio"/> | <input type="radio"/> | <input type="radio"/> | <input type="radio"/> | <input type="radio"/> | <input type="radio"/> | <input type="radio"/> |
|            | Bladder <input type="radio"/>  | <input type="radio"/> | <input type="radio"/> | <input type="radio"/> | <input type="radio"/> | <input type="radio"/> | <input type="radio"/> | <input type="radio"/> | <input type="radio"/> | <input type="radio"/> |

|            |                                        |                       |                       |                       |
|------------|----------------------------------------|-----------------------|-----------------------|-----------------------|
| <b>B-2</b> | <b>Amount</b>                          |                       |                       |                       |
|            | Low                                    | High                  | Medium                | Variable              |
|            | Digestive Power <input type="radio"/>  | <input type="radio"/> | <input type="radio"/> | <input type="radio"/> |
|            | Perspiration <input type="radio"/>     | <input type="radio"/> | <input type="radio"/> | <input type="radio"/> |
|            | Body Temperature <input type="radio"/> | <input type="radio"/> | <input type="radio"/> | <input type="radio"/> |
|            | Sleep <input type="radio"/>            | <input type="radio"/> | <input type="radio"/> | <input type="radio"/> |
|            | Dreams <input type="radio"/>           | <input type="radio"/> | <input type="radio"/> | <input type="radio"/> |

|            |                                                |                                    |
|------------|------------------------------------------------|------------------------------------|
| <b>B-3</b> | <b>Bowel habits</b>                            |                                    |
|            | <b>Frequency</b>                               | <b>Tendency towards</b>            |
|            | Regular <input type="radio"/>                  | Constipation <input type="radio"/> |
|            | Irregular <input type="radio"/>                | Loose motion <input type="radio"/> |
|            | Variable <input type="radio"/>                 | None <input type="radio"/>         |
|            | <b>Stool consistency</b>                       |                                    |
|            | Loose / Soft / SemiSolid <input type="radio"/> | Medium <input type="radio"/>       |
|            |                                                | Hard <input type="radio"/>         |

|            |                                 |  |
|------------|---------------------------------|--|
| <b>B-4</b> | <b>Body odour</b>               |  |
|            | Strong <input type="radio"/>    |  |
|            | Mild <input type="radio"/>      |  |
|            | Very less <input type="radio"/> |  |

|            |                               |  |
|------------|-------------------------------|--|
| <b>B-5</b> | <b>Quality of sleep</b>       |  |
|            | Deep <input type="radio"/>    |  |
|            | Sound <input type="radio"/>   |  |
|            | Shallow <input type="radio"/> |  |

|            |                                                            |  |
|------------|------------------------------------------------------------|--|
| <b>B-6</b> | <b>Body weight changes</b>                                 |  |
|            | Gain and lose easily <input type="radio"/>                 |  |
|            | Difficulty in gaining <input type="radio"/>                |  |
|            | Gain easily and lose with difficulty <input type="radio"/> |  |
|            | Stable <input type="radio"/>                               |  |

|            |             |               |                       |                       |                       |                       |                       |                       |                       |                       |                       |                       |                       |
|------------|-------------|---------------|-----------------------|-----------------------|-----------------------|-----------------------|-----------------------|-----------------------|-----------------------|-----------------------|-----------------------|-----------------------|-----------------------|
| <b>B-7</b> | <b>Food</b> |               | <b>Sweet</b>          | <b>Sour</b>           | <b>Salty</b>          | <b>Bitter</b>         | <b>Pungent</b>        | <b>Astringent</b>     | <b>Cold</b>           | <b>Warm</b>           | <b>Dry</b>            | <b>Oily</b>           |                       |
|            |             | Like          | <input type="radio"/> | <input type="radio"/> | <input type="radio"/> | <input type="radio"/> | <input type="radio"/> | <input type="radio"/> | <input type="radio"/> | <input type="radio"/> | <input type="radio"/> | <input type="radio"/> | <input type="radio"/> |
|            |             | Does Not Like | <input type="radio"/> | <input type="radio"/> | <input type="radio"/> | <input type="radio"/> | <input type="radio"/> | <input type="radio"/> | <input type="radio"/> | <input type="radio"/> | <input type="radio"/> | <input type="radio"/> | <input type="radio"/> |
|            |             | Suit          | <input type="radio"/> | <input type="radio"/> | <input type="radio"/> | <input type="radio"/> | <input type="radio"/> | <input type="radio"/> | <input type="radio"/> | <input type="radio"/> | <input type="radio"/> | <input type="radio"/> | <input type="radio"/> |
|            |             | Does Not Suit | <input type="radio"/> | <input type="radio"/> | <input type="radio"/> | <input type="radio"/> | <input type="radio"/> | <input type="radio"/> | <input type="radio"/> | <input type="radio"/> | <input type="radio"/> | <input type="radio"/> | <input type="radio"/> |

|            |                |          |                       |                             |
|------------|----------------|----------|-----------------------|-----------------------------|
| <b>B-8</b> | <b>Weather</b> |          | <b>Prefer</b>         | <b>Have health problems</b> |
|            |                | Cold     | <input type="radio"/> | <input type="radio"/>       |
|            |                | Warm     | <input type="radio"/> | <input type="radio"/>       |
|            |                | Dry      | <input type="radio"/> | <input type="radio"/>       |
|            |                | Moist    | <input type="radio"/> | <input type="radio"/>       |
|            |                | Moderate | <input type="radio"/> | <input type="radio"/>       |
|            |                | Stable   | <input type="radio"/> | <input type="radio"/>       |

|            |                       |                       |                       |                             |
|------------|-----------------------|-----------------------|-----------------------|-----------------------------|
| <b>B-9</b> | <b>Season</b>         |                       | <b>Prefer</b>         | <b>Have health problems</b> |
|            |                       | Summer                | <input type="radio"/> | <input type="radio"/>       |
|            |                       | Early winter          | <input type="radio"/> | <input type="radio"/>       |
|            |                       | Late winter           | <input type="radio"/> | <input type="radio"/>       |
|            |                       | Autumn                | <input type="radio"/> | <input type="radio"/>       |
|            |                       | Spring                | <input type="radio"/> | <input type="radio"/>       |
|            |                       | Rainy season          | <input type="radio"/> | <input type="radio"/>       |
|            |                       | Season transition     | <input type="radio"/> | <input type="radio"/>       |
| None       | <input type="radio"/> | <input type="radio"/> |                       |                             |

### C. Physical Activities

|            |                |                      |                       |              |                       |                  |                       |                  |                       |
|------------|----------------|----------------------|-----------------------|--------------|-----------------------|------------------|-----------------------|------------------|-----------------------|
| <b>C-1</b> | <b>Walking</b> |                      | <b>Speed</b>          | <b>Steps</b> | <b>Amount</b>         | <b>Style</b>     |                       |                  |                       |
|            |                | Quick / Fast / Brisk | <input type="radio"/> | Small        | <input type="radio"/> | Less             | <input type="radio"/> | Firm / Steady    | <input type="radio"/> |
|            |                | Medium               | <input type="radio"/> | Medium       | <input type="radio"/> | High / Excessive | <input type="radio"/> | Unsteady         | <input type="radio"/> |
|            |                | Slow                 | <input type="radio"/> | Large        | <input type="radio"/> | Moderate         | <input type="radio"/> | Sharp / accurate | <input type="radio"/> |
|            |                | Variable             | <input type="radio"/> |              |                       |                  |                       |                  |                       |

|            |                |                  |                       |                            |                         |                  |                       |
|------------|----------------|------------------|-----------------------|----------------------------|-------------------------|------------------|-----------------------|
| <b>C-2</b> | <b>Working</b> |                  | <b>Speed</b>          | <b>Quality</b>             | <b>Style / Accuracy</b> |                  |                       |
|            |                | Quick/Fast/Brisk | <input type="radio"/> | Well thought of            | <input type="radio"/>   | Firm / Steady    | <input type="radio"/> |
|            |                | Medium           | <input type="radio"/> | Wavering / Easily deviated | <input type="radio"/>   | Unsteady         | <input type="radio"/> |
|            |                | Slow             | <input type="radio"/> | Sharp/Accurate/Spontaneous | <input type="radio"/>   | Sharp / Accurate | <input type="radio"/> |
|            |                | Variable         | <input type="radio"/> |                            |                         |                  |                       |

|            |                                                        |                  |                       |                       |                       |                       |                       |                       |                       |                       |                       |                       |
|------------|--------------------------------------------------------|------------------|-----------------------|-----------------------|-----------------------|-----------------------|-----------------------|-----------------------|-----------------------|-----------------------|-----------------------|-----------------------|
| <b>C-3</b> | <b>Voluntary / Involuntary movements of body parts</b> |                  | <b>Eyes</b>           | <b>Eyebrows</b>       | <b>Jaw</b>            | <b>Lips</b>           | <b>Tongue</b>         | <b>Head</b>           | <b>Shoulder</b>       | <b>Hands</b>          | <b>Legs</b>           |                       |
|            |                                                        | Less             | <input type="radio"/> | <input type="radio"/> | <input type="radio"/> | <input type="radio"/> | <input type="radio"/> | <input type="radio"/> | <input type="radio"/> | <input type="radio"/> | <input type="radio"/> | <input type="radio"/> |
|            |                                                        | Moderate         | <input type="radio"/> | <input type="radio"/> | <input type="radio"/> | <input type="radio"/> | <input type="radio"/> | <input type="radio"/> | <input type="radio"/> | <input type="radio"/> | <input type="radio"/> | <input type="radio"/> |
|            |                                                        | High / Excessive | <input type="radio"/> | <input type="radio"/> | <input type="radio"/> | <input type="radio"/> | <input type="radio"/> | <input type="radio"/> | <input type="radio"/> | <input type="radio"/> | <input type="radio"/> | <input type="radio"/> |

|            |        |                         |                          |                       |                                |                       |                            |                       |
|------------|--------|-------------------------|--------------------------|-----------------------|--------------------------------|-----------------------|----------------------------|-----------------------|
| <b>C-4</b> |        | <b>Quality of voice</b> | <b>Content of speech</b> |                       |                                |                       |                            |                       |
|            | Low    | <input type="radio"/>   | Good tone                | <input type="radio"/> | Consistent                     | <input type="radio"/> | Convincing                 | <input type="radio"/> |
|            | Feeble | <input type="radio"/>   | Sharp                    | <input type="radio"/> | Inconsistent                   | <input type="radio"/> | Argumentative              | <input type="radio"/> |
|            | Weak   | <input type="radio"/>   | Clear                    | <input type="radio"/> | Moderate                       | <input type="radio"/> | Sweet and pleasing to ears | <input type="radio"/> |
|            | Broken | <input type="radio"/>   | High pitched             | <input type="radio"/> | Well guarded / Well thought of | <input type="radio"/> | Avoid confrontations       | <input type="radio"/> |
|            | Rough  | <input type="radio"/>   | Loud                     | <input type="radio"/> | Wavering / Easily Deviated     | <input type="radio"/> | Deviated from main topic   | <input type="radio"/> |
|            | Deep   | <input type="radio"/>   | Soft, pleasing           | <input type="radio"/> | Sharp / Accurate / Spontaneous | <input type="radio"/> | Irrelevant in between      | <input type="radio"/> |

|            |                 |                      |                       |               |                       |
|------------|-----------------|----------------------|-----------------------|---------------|-----------------------|
| <b>C-5</b> | <b>Speaking</b> |                      | <b>Speed</b>          | <b>Amount</b> |                       |
|            |                 | Quick / Fast / Brisk | <input type="radio"/> | Less          | <input type="radio"/> |
|            |                 | Medium               | <input type="radio"/> | Moderate      | <input type="radio"/> |
|            |                 | Slow                 | <input type="radio"/> | Excessive     | <input type="radio"/> |
|            |                 | Variable             | <input type="radio"/> |               |                       |

## D. Strength at Various Levels

|            |                 |                       |               |                       |                         |                       |                      |                       |
|------------|-----------------|-----------------------|---------------|-----------------------|-------------------------|-----------------------|----------------------|-----------------------|
| <b>D-1</b> | <b>Physical</b> |                       | <b>Mental</b> |                       | <b>Resistance Power</b> |                       | <b>Healing Power</b> |                       |
|            | Grade 1         | <input type="radio"/> | Grade 1       | <input type="radio"/> | Grade 1                 | <input type="radio"/> | Grade 1              | <input type="radio"/> |
|            | Grade 2         | <input type="radio"/> | Grade 2       | <input type="radio"/> | Grade 2                 | <input type="radio"/> | Grade 2              | <input type="radio"/> |
|            | Grade 3         | <input type="radio"/> | Grade 3       | <input type="radio"/> | Grade 3                 | <input type="radio"/> | Grade 3              | <input type="radio"/> |

## E. Psychological Functions

|            |                    |                       |                       |                       |                       |
|------------|--------------------|-----------------------|-----------------------|-----------------------|-----------------------|
| <b>E-1</b> | <b>Speed</b>       |                       |                       |                       |                       |
|            |                    | <b>Quickly</b>        | <b>Moderately</b>     | <b>Slowly</b>         | <b>Variably</b>       |
|            | Memorizing         | <input type="radio"/> | <input type="radio"/> | <input type="radio"/> | <input type="radio"/> |
|            | Forgetfulness      | <input type="radio"/> | <input type="radio"/> | <input type="radio"/> | <input type="radio"/> |
|            | Recalling          | <input type="radio"/> | <input type="radio"/> | <input type="radio"/> | <input type="radio"/> |
|            | Initiation         | <input type="radio"/> | <input type="radio"/> | <input type="radio"/> | <input type="radio"/> |
|            | Making new friends | <input type="radio"/> | <input type="radio"/> | <input type="radio"/> | <input type="radio"/> |
|            | Anger              | <input type="radio"/> | <input type="radio"/> | <input type="radio"/> | <input type="radio"/> |
|            | Irritability       | <input type="radio"/> | <input type="radio"/> | <input type="radio"/> | <input type="radio"/> |

|                   |                       |                                   |                       |                                   |
|-------------------|-----------------------|-----------------------------------|-----------------------|-----------------------------------|
| <b>E-2</b>        | <b>Quality</b>        |                                   |                       |                                   |
|                   |                       | <b>Good / Firm/ Stable / High</b> | <b>Medium</b>         | <b>Poor / Wavering / Unstable</b> |
|                   | Retaining             | <input type="radio"/>             | <input type="radio"/> | <input type="radio"/>             |
|                   | Planning              | <input type="radio"/>             | <input type="radio"/> | <input type="radio"/>             |
|                   | Execution             | <input type="radio"/>             | <input type="radio"/> | <input type="radio"/>             |
|                   | Achieving ends        | <input type="radio"/>             | <input type="radio"/> | <input type="radio"/>             |
|                   | Retaining friends     | <input type="radio"/>             | <input type="radio"/> | <input type="radio"/>             |
|                   | Anger                 | <input type="radio"/>             | <input type="radio"/> | <input type="radio"/>             |
|                   | Forgiveness           | <input type="radio"/>             | <input type="radio"/> | <input type="radio"/>             |
|                   | Generosity            | <input type="radio"/>             | <input type="radio"/> | <input type="radio"/>             |
| Faith and beliefs | <input type="radio"/> | <input type="radio"/>             | <input type="radio"/> |                                   |

|            |                    |                       |                       |
|------------|--------------------|-----------------------|-----------------------|
| <b>E-3</b> | <b>Memory type</b> |                       |                       |
|            |                    | <b>Good</b>           | <b>Poor</b>           |
|            | Olfactory          | <input type="radio"/> | <input type="radio"/> |
|            | Auditory           | <input type="radio"/> | <input type="radio"/> |
|            | Tactile            | <input type="radio"/> | <input type="radio"/> |
|            | Gustatory          | <input type="radio"/> | <input type="radio"/> |
|            | Visual             | <input type="radio"/> | <input type="radio"/> |
