# Supplementary material for: Whole genome expression and biochemical correlates of extreme constitutional types defined in Ayurveda
Source: PubMed Central journal article supplement (PMC2562368; doi:10.1186/1479-5876-6-48), 2008-09-09
Supplement: 1479-5876-6-48-S3.pdf [file 1479-5876-6-48-S3.pdf]

**Additional File 3. Normal reference range for biochemical and hematological parameters**

| S.No | TESTS                       | Reference range (Female)  | Reference range (Male) |
|------|-----------------------------|---------------------------|------------------------|
| 1    | Glucose ®                   | 70-140 mg/dl              | 70-140 mg/dL           |
| 2    | S.Uric acid                 | 2.4-5.7 mg/dl             | 3.4-7.0 mg/dL          |
| 3    | Prothrombin Time            | 11.5-15.5 sec.            | 11.5-15.5 sec.         |
| 4    | Phosphorus                  | 2.7-4.5 mg/dl             | 2.7-4.50 mg/dL         |
| 5    | Copper                      | 80-155 ug/dl              | 70-140 ug/dL           |
| 6    | Zinc(ATOMIC ABSORP)         | 670-1240 ug/L             | 670-1240 ug/L          |
| 7    | S.Ferritin                  | 10-291ng/mL               | 22-322ng/mL            |
| 8    | Haemoglobin                 | 11.5-15.3 g/dl            | 14-17.4 g/dL           |
| 9    | PCV                         | 36-45 %                   | 41.50-50.40 %          |
| 10   | RBC count                   | 4.5-5.1 mill/mm3          | 4.5-5.9 mill/mm3       |
| 11   | Platelet count              | 150-450 thou/mm3          | 150-450 thou/mm3       |
| 12   | Total Leucocytes            | 4.4-11.3 thou/mm3         | 4.4-11.3 thou/mm3      |
| 13   | Neutrophils                 | 45.5-74%                  | 45.5-74.00 %           |
| 14   | Lymphocytes                 | 22.3-50 %                 | 22.3-50 %              |
| 15   | Monocytes                   | 0.7-10 %                  | 0. 7-10 %              |
| 16   | Eosinophils                 | 1-6%                      | 1-6%                   |
| 17   | Basophils                   | <2%                       | <2%                    |
| 18   | ESR                         | 0-20 mm/ 1 hr             | 0-15 mm/1 hr           |
| 19   | S.prolactin                 | 2.8-29.2 ng/ml (nonpreg.) | 2.1-17.7 ng/mL         |
| 20   | Total Cholesterol           | 140-200 mg/dl             | 133-200 mg/dL          |
| 21   | TG                          | <150 mg/dl                | <150 mg/dL             |
| 22   | VLDL                        |                           | <40                    |
| 23   | LDL                         | < 100 mg/dl               | <130 mg/dL             |
| 24   | HDL                         | 45-70 mg/dl               | 35-60 mg/dL            |
| 25   | Homocysteine                | 5-15 uM                   | 5-15 uM                |
| 26   | Vitamin B12                 | 150-970 pg/ml             | 150-970 pg/ml          |
| 27   | SGOT ( AST)                 | <31 U/L                   | <37 U/L                |
| 28   | SGPT (ALT)                  | <31 U/L                   | <41 U/L                |
| 29   | Alkaline Phosphate          | 95-240 U/L                | 95-270 U/L             |
| 30   | Serum Iron                  | 37-145 ug/dl              | 59-158 ug/dL           |
| 31   | Total Iron Binding Capacity | 228-428 ug/dl             | 228-428 ug/dL          |
| 32   | Transferrin Saturation      | 16-45 %                   | 16-45 %                |
| 33   | GGPT                        | 7-32 U/L                  | 11-49 U/L              |
