# Supplementary material for: Whole genome expression and biochemical correlates of extreme constitutional types defined in Ayurveda
Source: PubMed Central journal article supplement (PMC2562368; doi:10.1186/1479-5876-6-48), 2008-09-09
Supplement: 1479-5876-6-48-S8.pdf [file 1479-5876-6-48-S8.pdf]

| <b>Additional File 8. Validation of differentially expressed genes from microarray experiments</b> |                        |                                     |                                      |           |           |           |            |
|----------------------------------------------------------------------------------------------------|------------------------|-------------------------------------|--------------------------------------|-----------|-----------|-----------|------------|
| <b>Test of significance between profiles in RT experiments</b>                                     |                        |                                     |                                      |           |           |           |            |
| <b>S.No</b>                                                                                        | <b>Validated Genes</b> | <b>Microarray profiles in males</b> | <b>Microarray profiles in female</b> | <b>VK</b> | <b>KP</b> | <b>PV</b> | <b>VPK</b> |
| 1                                                                                                  | ADM                    | V-K+P+                              |                                      | 0.01      | NS        | 0.01      | 0.01       |
| 2                                                                                                  | ATP5G2                 | V+K-P-                              | V-K+P-                               | 0.04      | NS        | 0.06      | NS         |
| 3                                                                                                  | CH25H                  | V-K+P+                              | V-K+P-                               | 0.02      | NS        | NS        | NS         |
| 4                                                                                                  | FAS                    | V-K-P+                              |                                      | 0.05      | NS        | 0.05      | NS         |
| 5                                                                                                  | FTL                    | V-K+P+                              |                                      | 0.02      | NS        | 0.04      | 0.05       |
| 6                                                                                                  | HLA-DQB1               | V+K-P+                              |                                      | 0.05      | NS        | 0.01      | 0.02       |
| 7                                                                                                  | KCNJ2                  | V+K-P+                              |                                      | NS        | NS        | 0.05      | NS         |
| 8                                                                                                  | TALDO1                 | V-K+P+                              |                                      | NS        | NS        | 0.04      | NS         |
| * Analysis has been combined for male and female samples                                           |                        |                                     |                                      |           |           |           |            |
