# Supplementary material for: Whole genome expression and biochemical correlates of extreme constitutional types defined in Ayurveda
Source: PubMed Central journal article supplement (PMC2562368; doi:10.1186/1479-5876-6-48), 2008-09-09
Supplement: 1479-5876-6-48-S10.pdf [file 1479-5876-6-48-S10.pdf]

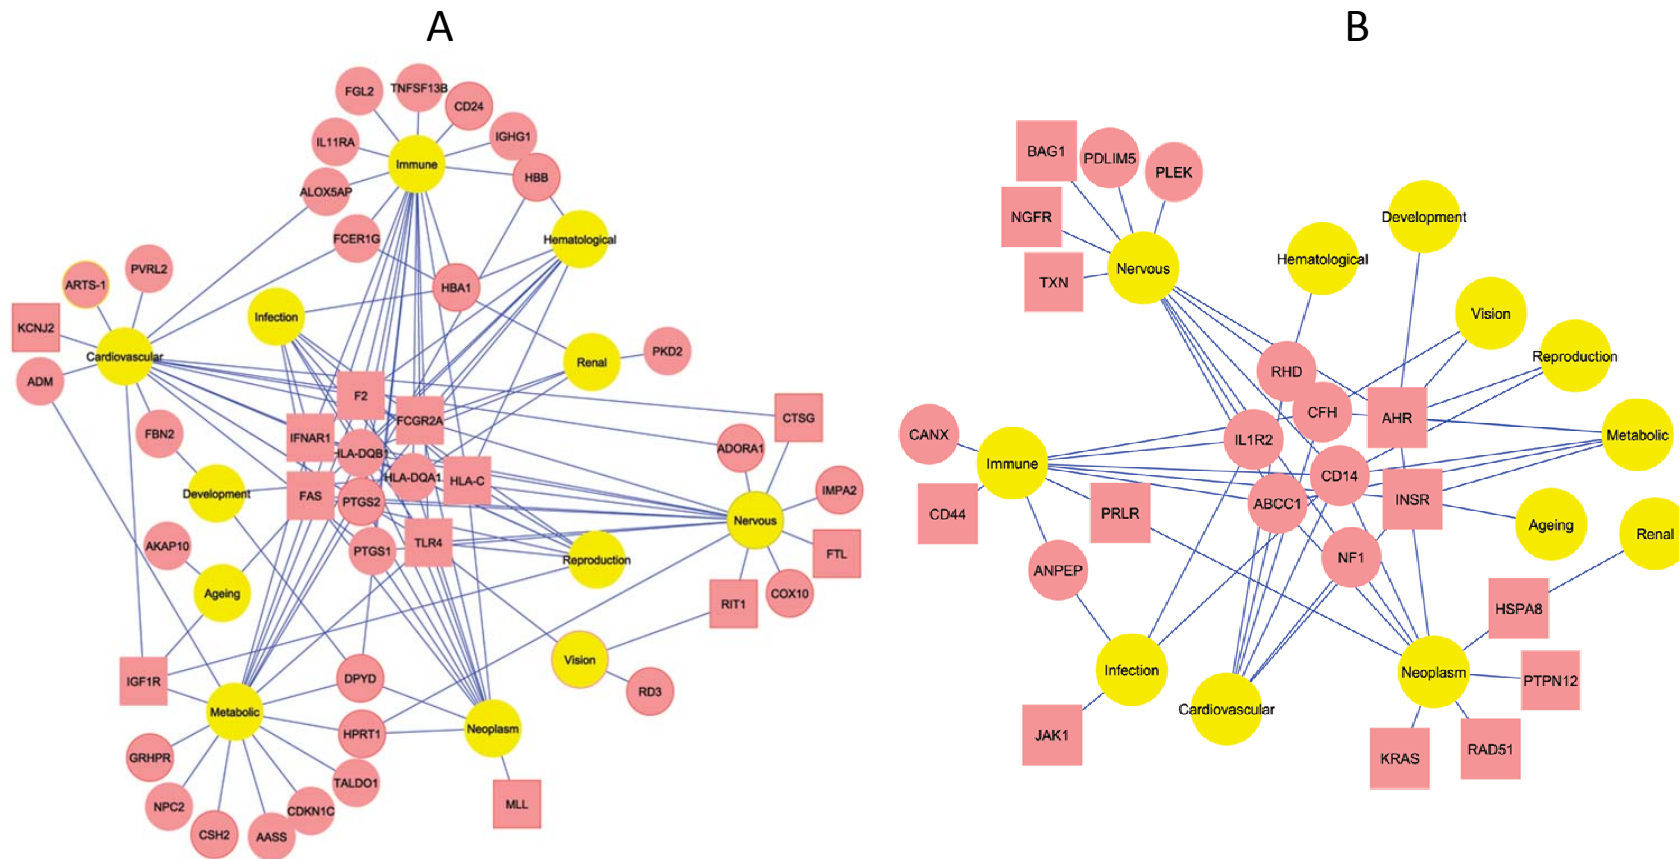

**Additional File 10. Disease gene network of differentially expressed genes among *Prakriti* groups** Networks of differentially expressed genes and their disease associations obtained from Genetic Association Database (GAD) and OMIM in males (A) and females (B). Networks have been depicted using Cytoscape version 2.4.1 (<http://www.cytoscape.org>). The nodes colored in yellow represent disease category and those in pink depict gene symbols. Hub genes are represented by pink square nodes. The most connected genes are placed in the centre of the network.
